# Supplementary material
Source: publisher site journal article supplement (https://www.dovepress.com/article/593792)
Supplement: Supplementary file 1 [file 593792%20Revised%20%2509Supplementary%20Material.docx]

The final interview guideline comprised the following questions:

1. How do you perceive the impact of stroke on your dietary behaviors?
2. Have you experienced any discomfort and/or challenges while engaging in dietary behaviors?
3. What coping strategies did you employ when encountering discomfort or challenges during dietary behaviors, and what were the outcomes of these strategies?
4. Which factors do you associate with your dietary behaviors? Specifically, what family-social or physical environmental factors have influenced your dietary patterns?
5. Did you receive companionship or support from family/friends while having meals? How was this support provided?

(f) Could you describe your internal thoughts when engaging in abnormal dietary behaviors? For instance, under what circumstances did your dietary choices deviate from your habits? What motivated these choices? How did external influences affect your decision-making process, and what were your internal reflections at the time?
